# Supplementary material for: Porous SnO2 nanosheets for room temperature ammonia sensing in extreme humidity
Source: Royal Society of Chemistry journal article supplement (doi:10.1039/d3mh01078c), 2023-10-31
Supplement: d3mh01078c1.pdf [file d3mh01078c1.pdf]

## Electronic Supplementary Information

### Porous SnO<sub>2</sub> Nanosheets for Room Temperature Ammonia Sensing in Extreme Humidity

Mohit Verma<sup>1</sup>, Gaurav Bahuguna<sup>1</sup>, Sukhwinder Singh<sup>1</sup>, Ankita Kumari<sup>2</sup>, Dibyajyoti Ghosh<sup>2,3</sup>  
Hossam Haick<sup>4</sup>, and Ritu Gupta<sup>1,2\*</sup>

<sup>1</sup>Advanced Materials and Devices Laboratory, Department of Chemistry, Indian Institute of Technology Jodhpur, Jodhpur, Rajasthan-342037, India

<sup>2</sup>Department of Chemistry, Indian Institute of Technology, Delhi, Hauz Khas, New Delhi 110016, India

<sup>3</sup>Department of Materials Science and Engineering, Indian Institute of Technology, Delhi, Hauz Khas, New Delhi 110016, India

<sup>4</sup>Department of Chemical Engineering and Russell Berrie Nanotechnology Institute, Technion – Israel Institute of Technology, Haifa 3200003, Israel

\*Corresponding Author: Prof. Ritu Gupta ([ritugupta@iitd.ac.in](mailto:ritugupta@iitd.ac.in))

#### Table of Contents:

|                   |                                                                                                                |
|-------------------|----------------------------------------------------------------------------------------------------------------|
| <b>Figure S1:</b> | I-V characteristics of sensors based on SnO <sub>2</sub> nanosheets.                                           |
| <b>Table S1:</b>  | Literature survey of chemiresistive gas sensors fabricated using SnO <sub>2</sub> nanosheets.                  |
| <b>Figure S2:</b> | Schematic depiction of procedure adopted for SnO <sub>2</sub> nanosheets synthesis at different pH conditions. |
| <b>Figure S3:</b> | (a-c) TEM images of SnO <sub>2</sub> nanosheets synthesized at pH 14 conditions.                               |
| <b>Figure S4:</b> | AFM image and height profile analysis of SnO <sub>2</sub> nanosheets.                                          |
| <b>Figure S5:</b> | (a-c) Zeta potential of SnO <sub>2</sub> nanosheets synthesized at different pH conditions.                    |
| <b>Table S2:</b>  | Crystallite size calculation from XRD data using Scherrer formula.                                             |
| <b>Figure S6:</b> | Rietveld refinement of X-ray diffraction pattern of SnO <sub>2</sub> nanosheets (pH 14).                       |
| <b>Figure S7:</b> | Raman spectra of samples synthesized at different pH conditions.                                               |
| <b>Table S3:</b>  | Literature comparison of synthesised SnO <sub>2</sub> nanosheets specific surface area                         |

|                    |                                                                                                                                                                                                                                                                                                                                                                                                                                                                                     |
|--------------------|-------------------------------------------------------------------------------------------------------------------------------------------------------------------------------------------------------------------------------------------------------------------------------------------------------------------------------------------------------------------------------------------------------------------------------------------------------------------------------------|
|                    | and pore volume.                                                                                                                                                                                                                                                                                                                                                                                                                                                                    |
| <b>Figure S8:</b>  | XPS survey spectrum of SnO <sub>2</sub> nanosheets synthesised at different pH conditions.                                                                                                                                                                                                                                                                                                                                                                                          |
| <b>Figure S9:</b>  | High resolution Sn3d and C1s XPS spectrum of SnO <sub>2</sub> nanosheets synthesised at different pH conditions.                                                                                                                                                                                                                                                                                                                                                                    |
| <b>Table S4:</b>   | High-resolution XPS peak positions of SnO <sub>2</sub> nanosheets synthesized at different pH conditions.                                                                                                                                                                                                                                                                                                                                                                           |
| <b>Table S5:</b>   | Oxygen defects concentration of SnO <sub>2</sub> nanosheets synthesized at different pH conditions.                                                                                                                                                                                                                                                                                                                                                                                 |
| <b>Figure S10:</b> | Schematic of the custom gas sensing setup for dynamic experiments.                                                                                                                                                                                                                                                                                                                                                                                                                  |
| <b>Figure S11:</b> | Variation in baseline current of SNS-14 at varying humidity.                                                                                                                                                                                                                                                                                                                                                                                                                        |
| <b>Figure S12:</b> | Sensing transients of SNS-14 towards different relative humidity (70-90%RH).                                                                                                                                                                                                                                                                                                                                                                                                        |
| <b>Figure S13:</b> | SNS-14 response toward 100 ppm ammonia at a varying relative humidity of 60-90% at room temperature.                                                                                                                                                                                                                                                                                                                                                                                |
| <b>Figure S14:</b> | Long-term stability of SNS-14 sensor towards 100 ppm ammonia under humid circumstances (90% RH).                                                                                                                                                                                                                                                                                                                                                                                    |
| <b>Figure S15:</b> | SNS-14 sensor (a) ammonia detecting transients for five cycles and (b) corresponding response value toward 100 ppm NH <sub>3</sub> at 25°C and 90% RH, demonstrating repeatability.                                                                                                                                                                                                                                                                                                 |
| <b>Figure S16:</b> | The current response of the SNS-14 toward a healthy person's breath and the simulated diseased breath containing 1 ppm NH <sub>3</sub> .                                                                                                                                                                                                                                                                                                                                            |
| <b>Figure S17:</b> | The 3D plots of the charge density difference $\Delta\rho(r)$ of the (a) H <sub>2</sub> O and (b) NH <sub>3</sub> molecules on the (110) surface of SnO <sub>2</sub> . Electron depletion and accumulation are depicted by blue and green areas, respectively. The isosurfaces are plotted as values of $\pm 0.002  e  \text{ \AA}^{-3}$ . These depict that the NH <sub>3</sub> molecule donates charge to the surface much more significantly than the H <sub>2</sub> O molecule. |

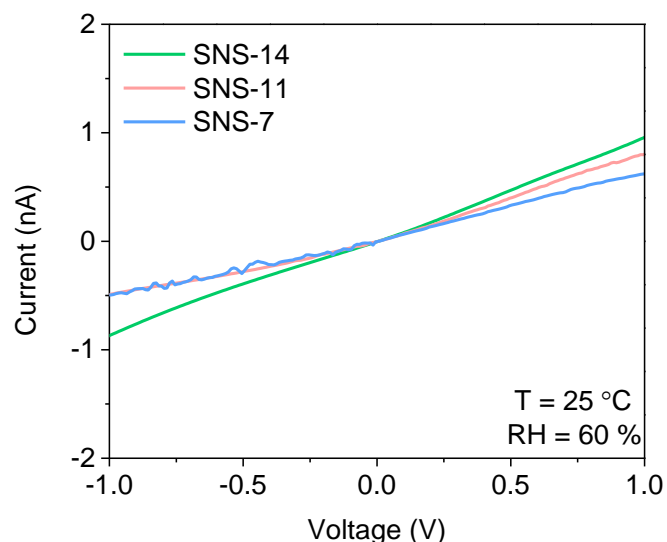

**Figure S1:** I-V characteristics of sensors based on SnO<sub>2</sub> nanosheets.

**Table S1:** A literature survey of gas/VOC sensors fabricated using SnO<sub>2</sub> nanosheets.

| Sensing gas/VOC | Temp (°C) | Response (a, b, c) (conc. ppm) | T <sub>res.</sub> (s) | T <sub>rev</sub> (s) | LOD (ppm) | RH (%) | Ref.      |
|-----------------|-----------|--------------------------------|-----------------------|----------------------|-----------|--------|-----------|
| Ammonia         | 25        | 106.5 <sup>a</sup> (100)       | 8                     | 55                   | 0.000064  | 70%    | This work |
| H <sub>2</sub>  | 300       | 7.5 <sup>b</sup> (500)         | 6                     | 12                   | NA        | NA     | 1         |
| CH <sub>4</sub> | 300       | 1.3 <sup>b</sup> (500)         | 18                    | 28                   | NA        | NA     | 2         |
| HCHO            | 120       | 57 <sup>b</sup> (100)          | 1.1                   | 1.5                  | NA        | NA     | 3         |
| Ethylene glycol | 220       | 395 <sup>b</sup> (400)         | 65                    | 72                   | 1.37      | NA     | 4         |
| Acetic acid     | 340       | 672 <sup>b</sup> (500)         | 11                    | 6                    | NA        | NA     | 5         |
| CO              | 300       | 60 <sup>b</sup> (100)          | 8                     | 15                   | NA        | 30%    | 6         |
| Ethanol         | 165       | 50.1 <sup>b</sup> (50)         | 29                    | 136                  | NA        | NA     | 7         |
| Ethanol         | 275       | 33 <sup>b</sup> (100)          | 11                    | 125                  | NA        | NA     | 8         |
| Ethanol         | 300       | 39.6 <sup>b</sup> (6)          | 1                     | 9                    | NA        | NA     | 9         |
| Ethanol         | 250       | 73.3 <sup>b</sup> (100)        | NA                    | NA                   | NA        | NA     | 10        |
| CO              | 300       | -(100)                         | 1                     | 3                    | NA        | NA     | 11        |
| Ethanol         | 275       | 56.2 <sup>b</sup> (100)        | NA                    | NA                   | NA        | NA     |           |
| Ethanol         | 350       | 48.37 <sup>b</sup> (100)       | 8                     | NA                   | NA        | NA     |           |

<sup>a</sup>  $\Delta R/R_a$  (%) or  $\Delta G/G_a$  (%) or  $\Delta I/I_a$  (%)},

<sup>b</sup> $R_a/R_g$  or  $G_a/G_g$  or  $I_a/I_g$ },  
<sup>c</sup> $\Delta R/R_a$  or  $\Delta G/G_a$  or  $\Delta I/I_a$  }

NA: Not Available

$R_a/I_a/G_a$ : resistance/current/conductance of material in the presence of air

$R_g/I_g/G_g$ : resistance/current/conductance of material in the presence of gas

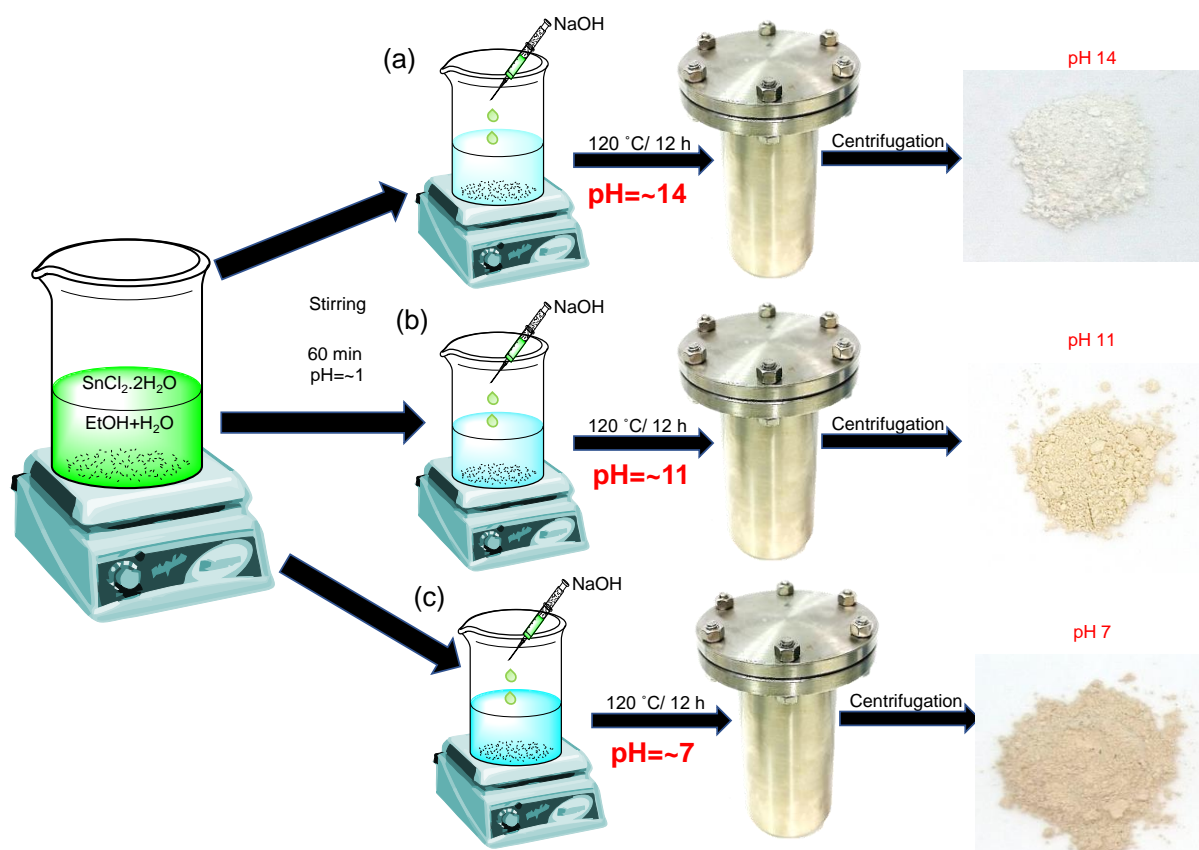

**Figure S2:** Schematic depiction of procedure adopted for SnO<sub>2</sub> nanosheet synthesis at different pH conditions of precursor solution before solvothermal reaction.

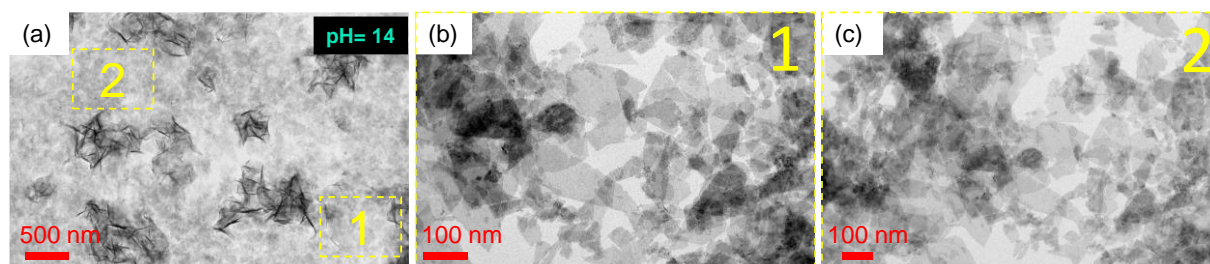

**Figure S3:** (a) Low magnification TEM images of SnO<sub>2</sub> nanosheets synthesized at pH 14 conditions to show uniformly dispersed nanosheets.

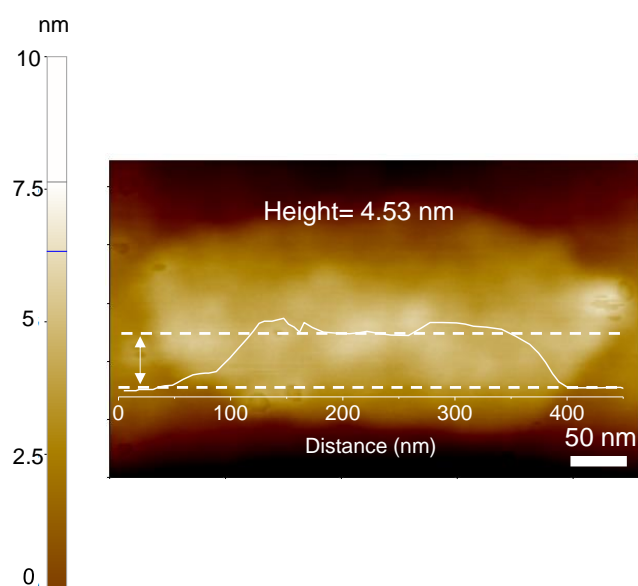

**Figure S4:** AFM image and height profile analysis of SnO<sub>2</sub> nanosheets.

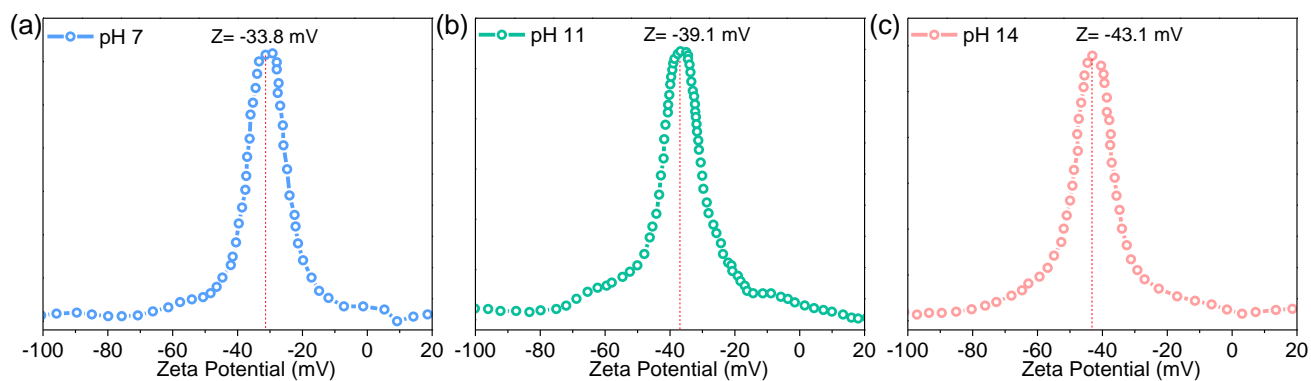

**Figure S5:** (a-c) Zeta potential of SnO<sub>2</sub> nanosheets synthesized at different pH conditions.

The stability of SnO<sub>2</sub> nanosheets at pH 14 is much higher than at pH 11 and pH 7.

**Table S2:** Crystallite size calculation from XRD data using Scherrer formula.

| Sample | (110) | (101) | (200) | (211) | Average Crystallite Size (nm) |
|--------|-------|-------|-------|-------|-------------------------------|
| pH 7   | 3.95  | 3.90  | 2.30  | 3.62  | 3.44                          |
| pH 11  | 4.17  | 3.92  | 2.92  | 3.79  | 3.70                          |
| pH 14  | 7.77  | 6.35  | 5.55  | 4.82  | 6.12                          |

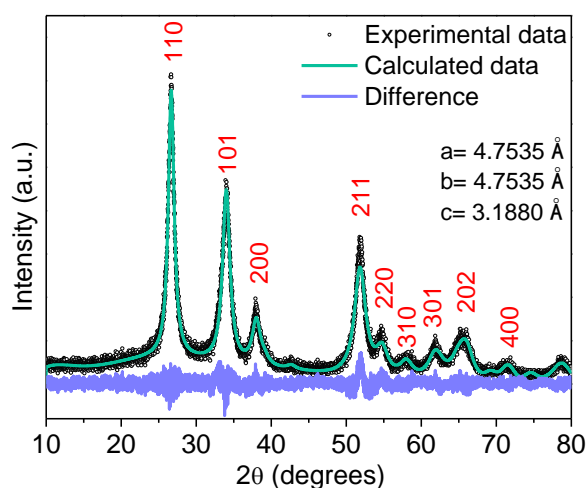

**Figure S6:** Rietveld refinement of the X-ray diffraction pattern of SnO<sub>2</sub> nanosheets (pH 14).

SnO<sub>2</sub> nanosheets show the tetragonal lattice parameters  $a=b= 0.4753$  nm,  $c= 0.3188$  nm, with planes 110, 101, and 200 having d-spacings of 0.342 nm, 0.243 nm, and 0.210 nm, respectively.

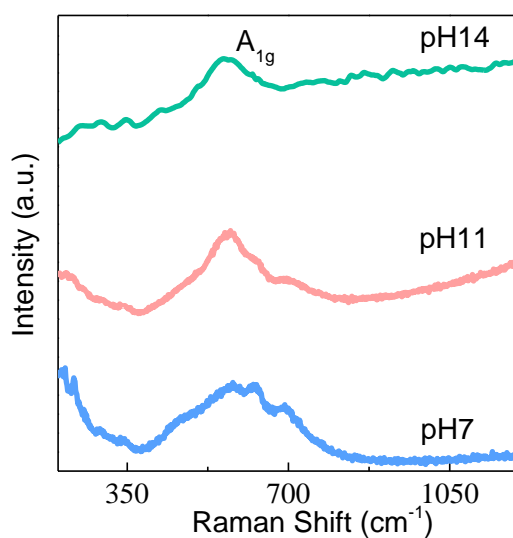

**Figure S7:** Raman spectra of samples synthesized at different pH conditions.

**Table S3:** Comparison of specific surface area and pore volume parameters for synthesized SnO<sub>2</sub> nanosheets with literature studies.

| Sample                                  | BET Surface Area (m <sup>2</sup> /g) | Pore Volume (cm <sup>3</sup> g <sup>-1</sup> ) | References |
|-----------------------------------------|--------------------------------------|------------------------------------------------|------------|
| SnO <sub>2</sub> Nanosheets (pH 7)      | 236.12                               | 0.108                                          | This work  |
| SnO <sub>2</sub> Nanosheets (pH 11)     | 124.19                               | 0.046                                          | This work  |
| SnO <sub>2</sub> Nanosheets (pH 14)     | 64.16                                | 0.025                                          | This work  |
| SnO <sub>2</sub> Nanosheets             | 62.29                                | NA                                             | 12         |
| Nanosheets                              | 21                                   | NA                                             | 13         |
| Atomically thin nanosheets              | 173.4                                | NA                                             | 14         |
| Crumpled SnO <sub>2</sub> Nanosheets    | 77.65                                | 0.218                                          | 15         |
| 2D SnO <sub>2</sub>                     | 78.21                                | 0.194                                          | 15         |
| Cone-shaped SnO <sub>2</sub> Nanosheets | 180.32                               | 1.028                                          | 16         |
| SnO <sub>2</sub> Nanosheets             | 68.78                                | NA                                             | 3          |

NA: Data Not Available

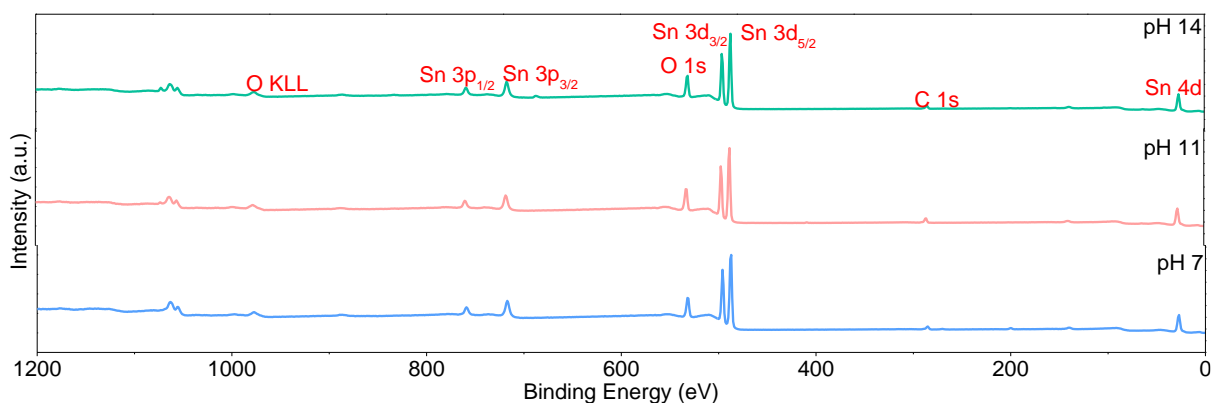

**Figure S8:** XPS survey spectra of SnO<sub>2</sub> nanosheets synthesized at different pH conditions.

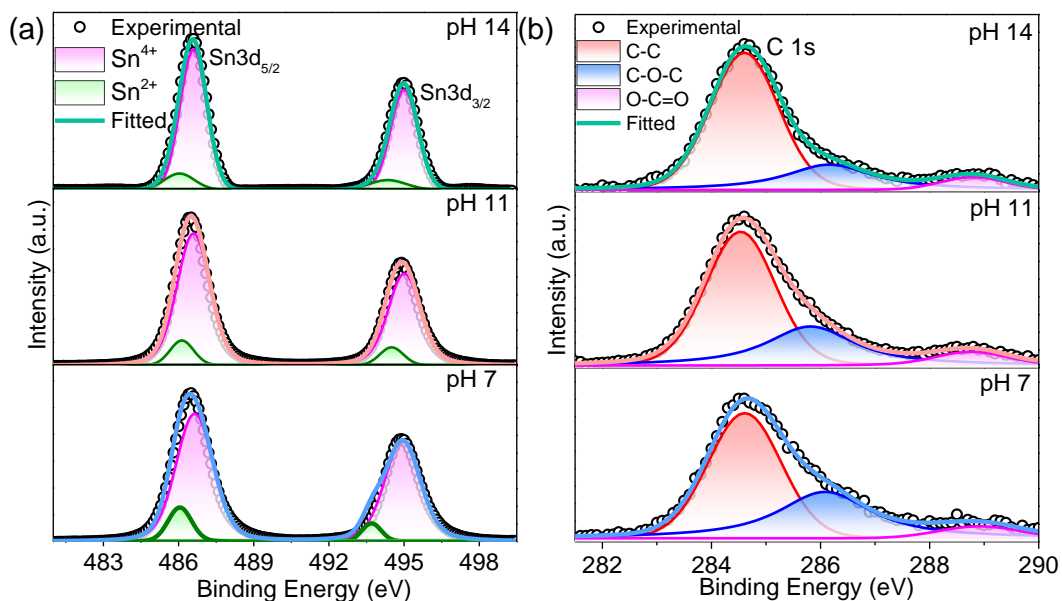

**Figure S9:** High-resolution Sn3d and C1s XPS spectrum of SnO<sub>2</sub> nanosheets synthesized at different pH conditions. The C1s spectra are carbon-corrected in all cases.

**Table S4:** High-resolution XPS peak positions of SnO<sub>2</sub> nanosheets synthesized at different pH conditions.

| Peak position (eV) | Sn3d <sub>5/2</sub> |                  | FWHM (eV) | O1s                  |                      |                   | FWHM (eV) | C1s   |       |       |
|--------------------|---------------------|------------------|-----------|----------------------|----------------------|-------------------|-----------|-------|-------|-------|
|                    | Sn <sup>2+</sup>    | Sn <sup>4+</sup> |           | O <sub>lattice</sub> | O <sub>defects</sub> | O <sub>chem</sub> |           | C-C   | C-O-C | C=O   |
| pH 14              | 486.03              | 486.5            | 1.32      | 530.5                | 531.9                | 533.1             | 1.77      | 284.6 | 286.2 | 288.8 |
| pH 11              | 486.13              | 486.6            | 1.56      | 530.5                | 531.8                | 533.0             | 2.26      | 284.6 | 285.8 | 288.7 |
| pH 7               | 486.05              | 486.6            | 1.71      | 530.4                | 531.8                | 533.0             | 2.29      | 284.6 | 286.0 | 288.9 |

**Table S5:** Oxygen defects concentration of SnO<sub>2</sub> nanosheets synthesized at different pH conditions.

| pH        | O-Sn <sup>4+</sup> |                      | O-Sn <sup>2+</sup> |                      | O <sub>Chem</sub>  |                      | Total O1s (%) | Chemisorbed Oxygen ratio | Oxygen Defects (%) |
|-----------|--------------------|----------------------|--------------------|----------------------|--------------------|----------------------|---------------|--------------------------|--------------------|
|           | Peak position (eV) | Area under the curve | Peak position (eV) | Area under the curve | Peak position (eV) | Area under the curve |               |                          |                    |
| <b>14</b> | 530.5              | 308761               | 531.9              | 54107                | 533.1              | 42919                | 52.3          | 5.5                      | 6.8                |
| <b>11</b> | 530.5              | 128425               | 531.8              | 41059                | 533.0              | 18618                | 53.6          | 5.3                      | 11.7               |
| <b>7</b>  | 530.4              | 109967               | 531.8              | 30327                | 533.0              | 10163                | 52.3          | 3.5                      | 10.5               |



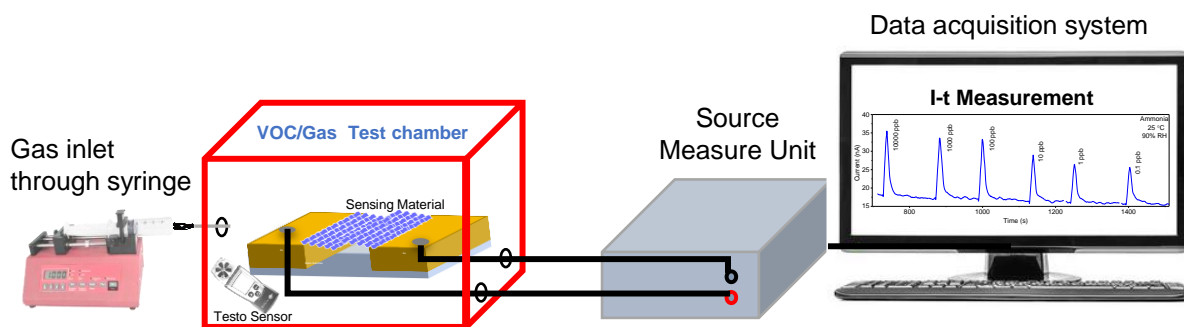

**Figure S10:** Schematic of the custom gas sensing setup used for dynamic experiments.

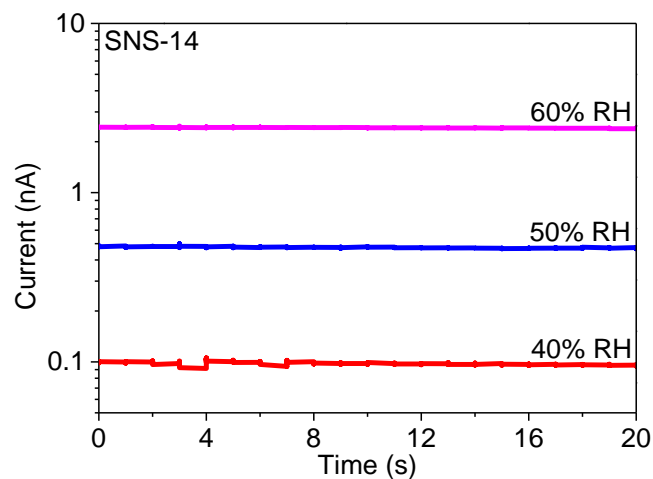

**Figure S11:** SNS-14 baseline current at varying humidity.

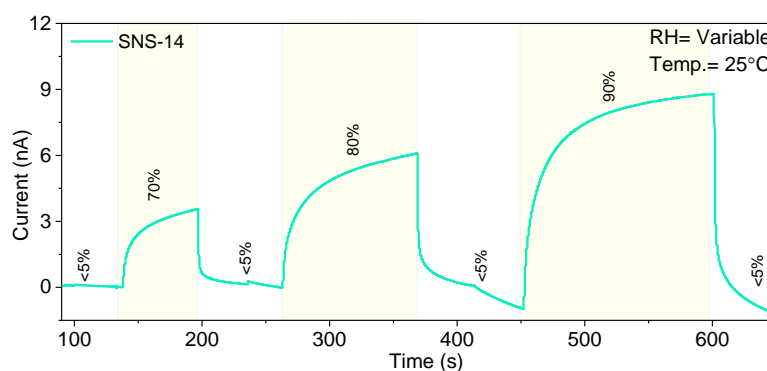

**Figure S12:** Sensing transients of SNS-14 towards different relative humidity (70-90%RH).

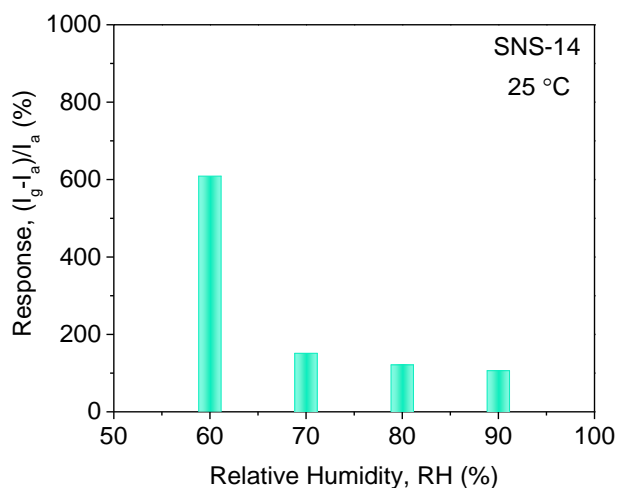

**Figure S13:** SNS-14 response toward 100 ppm ammonia at a varying relative humidity of 60-90% at room temperature.

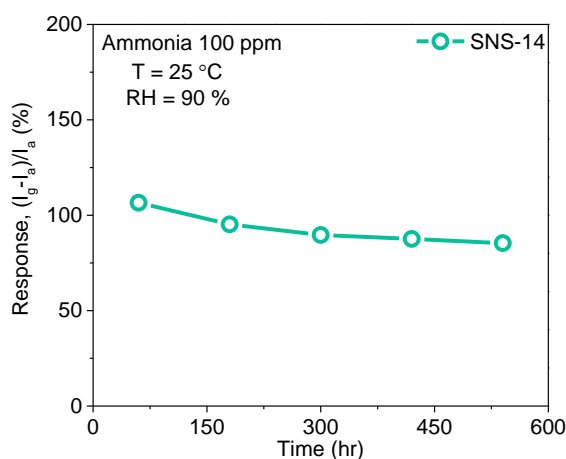

**Figure S14:** Long-term stability of SNS-14 sensor towards 100 ppm ammonia under humid conditions (90% RH).

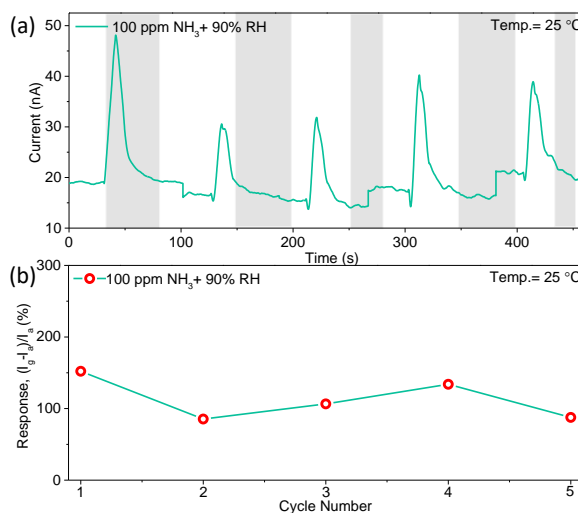

**Figure S15:** SNS-14 sensor (a) ammonia detecting transients for five cycles and (b) corresponding response value toward 100 ppm NH<sub>3</sub> at 25°C and 90% RH, demonstrating repeatability.

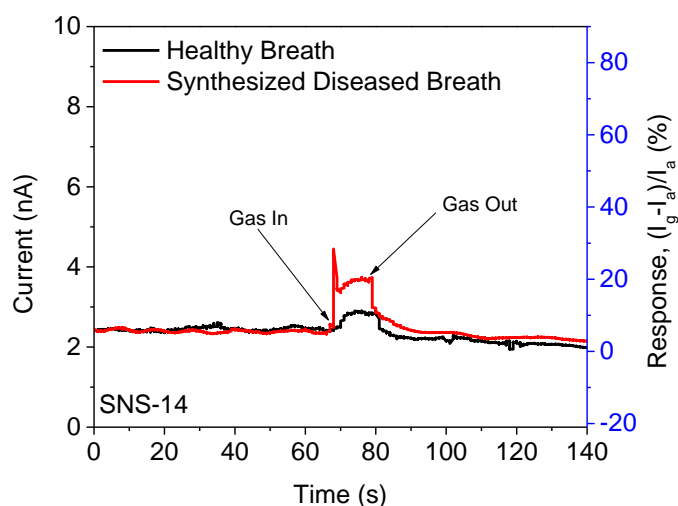

**Figure S16:** Current response of the SNS-14 toward a healthy person's breath and the simulated diseased breath containing 1 ppm  $\text{NH}_3$ .

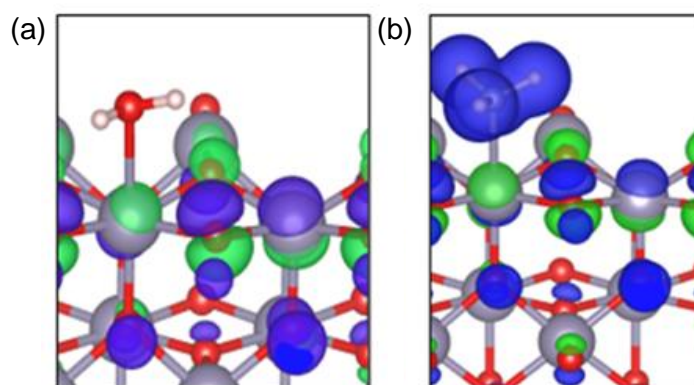

**Figure S17:** The 3D plots of the charge density difference  $\Delta\rho(r)$  of the (a)  $\text{H}_2\text{O}$  and (b)  $\text{NH}_3$  molecules on the (110) surface of  $\text{SnO}_2$ . Electron depletion and accumulation are depicted by blue and green areas, respectively. The isosurfaces are plotted as values of  $\pm 0.002 |e| \text{ \AA}^{-3}$ . These depict that the  $\text{NH}_3$  molecule donates charge to the surface much more significantly than the  $\text{H}_2\text{O}$  molecule.

#### References:

- (1) Choi, P. G.; Izu, N.; Shirahata, N.; Masuda, Y. Improvement of Sensing Properties for  $\text{SnO}_2$  Gas Sensor by Tuning of Exposed Crystal Face. *Sensors Actuators, B Chem.* **2019**, *296* (May), 126655.
- (2) Wang, D.; Wan, K.; Zhang, M.; Li, H.; Wang, P.; Wang, X.; Yang, J. Constructing Hierarchical  $\text{SnO}_2$  Nanofiber/Nanosheets for Efficient Formaldehyde Detection. *Sensors Actuators, B Chem.* **2019**, *283*, 714–723.
- (3) Wan, W.; Li, Y.; Ren, X.; Zhao, Y.; Gao, F.; Zhao, H. 2D  $\text{SnO}_2$  Nanosheets: Synthesis, Characterization, Structures, and Excellent Sensing Performance to Ethylene Glycol. *Nanomaterials* **2018**, *8* (2), 112.
- (4) Wang, T. T.; Ma, S. Y.; Cheng, L.; Xu, X. L.; Luo, J.; Jiang, X. H.; Li, W. Q.; Jin, W.

- X.; Sun, X. X. Performance of 3D SnO<sub>2</sub> Microstructure with Porous Nanosheets for Acetic Acid Sensing. *Mater. Lett.* **2015**, *142*, 141–144.
- (5) Zeng, W.; Wu, M.; Li, Y.; Wu, S. Hydrothermal Synthesis of Different SnO<sub>2</sub> Nanosheets with CO Gas Sensing Properties. *J. Mater. Sci. Mater. Electron.* **2013**, *24* (10), 3701–3706.
  - (6) Zhang, L.; Yin, Y. Hierarchically Mesoporous SnO<sub>2</sub> Nanosheets: Hydrothermal Synthesis and Highly Ethanol-Sensitive Properties Operated at Low Temperature. *Sensors Actuators, B Chem.* **2013**, *185*, 594–601.
  - (7) Sun, P.; Mei, X.; Cai, Y.; Ma, J.; Sun, Y.; Liang, X.; Liu, F.; Lu, G. Synthesis and Gas Sensing Properties of Hierarchical SnO<sub>2</sub> Nanostructures. *Sensors Actuators, B Chem.* **2013**, *187*, 301–307.
  - (8) Lou, Z.; Wang, L.; Wang, R.; Fei, T.; Zhang, T. Synthesis and Ethanol Sensing Properties of SnO<sub>2</sub> Nanosheets via a Simple Hydrothermal Route. *Solid. State. Electron.* **2012**, *76*, 91–94.
  - (9) Sun, P.; Cao, Y.; Liu, J.; Sun, Y.; Ma, J.; Lu, G. Dispersive SnO<sub>2</sub> Nanosheets: Hydrothermal Synthesis and Gas-Sensing Properties. *Sensors Actuators, B Chem.* **2011**, *156* (2), 779–783.
  - (10) Sun, P.; Zhao, W.; Cao, Y.; Guan, Y.; Sun, Y.; Lu, G. Porous SnO<sub>2</sub> Hierarchical Nanosheets: Hydrothermal Preparation, Growth Mechanism, and Gas Sensing Properties. *CrystEngComm* **2011**, *13* (11), 3718–3724.
  - (11) Xu, M. H.; Cai, F. S.; Yin, J.; Yuan, Z. H.; Bie, L. J. Facile Synthesis of Highly Ethanol-Sensitive SnO<sub>2</sub> Nanosheets Using Homogeneous Precipitation Method. *Sensors Actuators, B Chem.* **2010**, *145* (2), 875–878.
  - (12) Xu, R.; Zhang, L. X.; Li, M. W.; Yin, Y. Y.; Yin, J.; Zhu, M. Y.; Chen, J. J.; Wang, Y.; Bie, L. J. Ultrathin SnO<sub>2</sub> Nanosheets with Dominant High-Energy {001} Facets for Low Temperature Formaldehyde Gas Sensor. *Sensors Actuators, B Chem.* **2019**, *289* (August 2018), 186–194.
  - (13) Wang, H.; Dou, K.; Teoh, W. Y.; Zhan, Y.; Hung, T. F.; Zhang, F.; Xu, J.; Zhang, R.; Rogach, A. L. Engineering of Facets, Band Structure, and Gas-Sensing Properties of Hierarchical Sn<sup>2+</sup>-Doped SnO<sub>2</sub> Nanostructures. *Adv. Funct. Mater.* **2013**, *23* (38), 4847–4853.
  - (14) Sun, Y.; Lei, F.; Gao, S.; Pan, B.; Zhou, J.; Xie, Y. Atomically Thin Tin Dioxide Sheets for Efficient Catalytic Oxidation of Carbon Monoxide. *Angew. Chemie - Int. Ed.* **2013**, *52* (40), 10569–10572.
  - (15) Kim, R.; Jang, J. S.; Kim, D. H.; Kang, J. Y.; Cho, H. J.; Jeong, Y. J.; Kim, I. D. A General Synthesis of Crumpled Metal Oxide Nanosheets as Superior Chemiresistive Sensing Layers. *Adv. Funct. Mater.* **2019**, *29* (31), 1–10.
  - (16) Wang, C.; Zhou, Y.; Ge, M.; Xu, X.; Zhang, Z.; Jiang, J. Z. Large-Scale Synthesis of SnO<sub>2</sub> Nanosheets with High Lithium Storage Capacity. *J. Am. Chem. Soc.* **2010**, *132* (1), 46–47.
